# Supplementary material for: NRF1 and ZSCAN10 bind to the promoter region of the SIX1 gene and their effects body measurements in Qinchuan cattle
Source: PubMed Central journal article supplement (PMC5554236; doi:10.1038/s41598-017-08384-1), 2017-08-11
Supplement: 41598_2017_8384_MOESM1_ESM.pdf [file 41598_2017_8384_MOESM1_ESM.pdf]

# **NRF1 and ZSCAN10 bind to the promoter region of the SIX1 gene and their effects body measurements in Qinchuan cattle**

**Da-Wei Wei<sup>1,4†</sup>, Lin-Sheng Gui<sup>1,4†</sup>, Song-Zhang<sup>1,4</sup>, Rajwali Khan<sup>1</sup>, Sayed Haidar Abbas Raza<sup>1</sup>, Li-Wang<sup>1,4</sup>,  
Hong-Fang Guo<sup>1,4</sup> and Lin-Sen Zan<sup>1,2,3</sup>**

<sup>1</sup>College of Animal Science and Technology, Northwest A&F University, Yangling 712100 Shaanxi, People's Republic of China. <sup>2</sup>National Beef Cattle Improvement Center, Northwest A&F University, Yangling 712100 Shaanxi, People's Republic of China. <sup>3</sup>Modern Cattle Biotechnology and Application of National-Local Engineering Research Center, Yangling 712100 Shaanxi, People's Republic of China. <sup>4</sup>Shaanxi Beef Cattle Engineering Research Center, Yangling 712100 Shaanxi, People's Republic of China. Correspondence and requests for materials should be addressed to L.-S.Z. (email: zanlinsen@163.com).

† These authors contributed equally to this study.

**Table S1. Primers used in the expression and functional analysis of the SIX1 promoter experiments**

| Reaction         | Name                          | Function                    | Primer Sequence (5' to 3')                                                                | Tm (°C) | Product Length(bp) | Amplified Region |
|------------------|-------------------------------|-----------------------------|-------------------------------------------------------------------------------------------|---------|--------------------|------------------|
| qRT-PCR          | GAPDH                         | Reference                   | F: CCAACGTGTCTGTTGTGGAT<br>R: CTGCTTCACCACCTTCTTGA                                        | 61.0    | 80                 | 778-857          |
|                  | SIX 1                         | RT-PCR                      | F: GCCAAGGAAAGGGAGAACA<br>R: GACTCTGGGGAGGTGAGAACT                                        | 61.0    | 127                | 866-992          |
| 5' RACE          | R1                            |                             | GGCAGGGTCTACCAAGCACCGTTTCC                                                                | 66.5    | 555                |                  |
|                  | R2                            |                             | CACTCCGCTCTTGACCACCGAGA                                                                   | 60.0    | 475                |                  |
| Promoter cloning | Primer A                      | 5'flanking region           | F: ATCAGCATTGCTTCCAAGT<br>R: TTGAGAGATGTCTTGAATTTTC                                       | 62.5    | 728                | -1824/-1097      |
|                  | Primer B                      | 5'flanking region           | F: ACTAAGCATTCTCCACACATAC<br>R: TGTGGAATGAATAAGTAATG                                      | 59.0    | 750                | -1164/-415       |
|                  | Primer C                      | 5'flanking region           | F: GTCTACGCTTGTATTATTTATCG<br>R: AAGGAACGGCCGGCTCACTC                                     | 61.5    | 602                | -483/+118        |
|                  | -1802                         | 5'flanking region           | F: <i>CGGGGTACCTAATTGCCTGGGATACTGAA</i>                                                   | 63.5    | 1947               | -1802/+144       |
|                  | -1488                         | 5'flanking region           | F: <i>CGGGGTACCGAAGCAAATTTAAAGAACCTA</i>                                                  | 62.0    | 1633               | -1488/+144       |
|                  | -1044                         | 5'flanking region           | F: <i>CGGGGTACCCACACACATGCACACACACAC</i>                                                  | 65.0    | 1189               | -1044/+144       |
|                  | -708                          | 5'flanking region           | F: <i>CGGGGTACCAATCTCTATTTGCTCAGCAAC</i>                                                  | 60.5    | 853                | -708/+144        |
|                  | -483                          | 5'flanking region           | F: <i>CGGGGTACCGTCTACGCTTGTATTATTTATCG</i>                                                | 64.0    | 628                | -483/+144        |
|                  | -216                          | 5'flanking region           | F: <i>CGGGGTACCTCACGTTGCAAGGTCCTGAC</i>                                                   | 63.5    | 361                | -216/+144        |
|                  | -28<br>+144                   | 5'flanking region<br>Exon 1 | F: <i>CGGGGTACCAATCAGCGCGCCGAGAACGC</i><br>R: <i>GGAAGATCTGAGGAGGAGTAGAGCGCGCGC</i>       | 60.0    | 173                | -28/+144         |
| EMSA             | NRF1 forward                  |                             | CCGGCCCGGCGCGC <i>CGCA</i> GGCTGGCCAGCCCCGG                                               |         |                    | -80/-46          |
|                  | NRF1 reverse                  |                             | CCGGGGCTGGCCAGCC <i>TGCG</i> CGCCCGGGCCCG                                                 |         |                    |                  |
|                  | mNRF1 forward                 |                             | CCGGCCCGGCGCGC <i>TTTT</i> GGCTGGCCAGCCCCGG                                               |         |                    | -80/-46          |
|                  | mNRF1 reverse                 |                             | CCGGGGCTGGCCAGCC <i>AAAA</i> CGCCCGGGCCCG                                                 |         |                    |                  |
|                  | ZF15 forward                  |                             | CGGCCCGGCGCGC <i>CGCA</i> GGCTGGCCAGCCCCGGA                                               |         |                    | -79/-45          |
|                  | ZF15 reverse                  |                             | TCCGGGGCTGGCCAGCC <i>TGCG</i> CGCCCGGGCCCG                                                |         |                    |                  |
|                  | mZF15forward<br>mZF15 reverse |                             | CGGCCCGGCGCGC <i>TTTT</i> GGCTGGCCAGCCCCGGA<br>TCCGGGGCTGGCCAGCC <i>AAAA</i> CGCCCGGGCCCG |         |                    | -79/-45          |
| ChIP             | ChIP-NRF1/<br>ZSCAN10         |                             | F: CCCACTTTCGCTTCTCACCACCTC<br>R: CCGGCTCACTCCGAGCTTTT                                    | 60.0    | 261                | -152/+109        |
|                  | ChIP- control                 | Exon 2                      | F: TCCTAAGAAGGGAGGGACTGG<br>R: AGGCTGGTAACCTGGATGTTT                                      | 60.0    | 283                | 3180/3463        |

The italicized letters of the forward (F) and reverse (R) primers were enzyme cutting sites of *KpnI* and *BglII*, the underlined bases are core putative transcription factor-binding sites, respectively.

**Table S2. The different potential *cis*-acting elements between wild types and SNPs sequence in the proximal minimal promoter of bovine SIX1.**

| Item | Transcription factors                               | Optimized | <i>Cis</i> -acting elements (Recognition sequence) | Target strand | SNPs         |
|------|-----------------------------------------------------|-----------|----------------------------------------------------|---------------|--------------|
| WT1  | Regulatory factor X 3 (RFX 3)                       | 0.84      | cgggCTG <i>C</i> gaggccgccc                        | (-)           |              |
| SNP1 | NONE                                                | 0.9       | cgggCTG <i>A</i> gaggccgccc                        | (-)           | g. -85 G > T |
| WT2  | ZF5 POZ domain zinc finger (ZF5F)                   | 0.83      | cagcc <i>C</i> GCGcgcgc                            | (-)           |              |
|      | Cell cycle-dependent element (CDEF)                 | 0.87      | ggcgCGC <i>G</i> ggctg                             | (+)           |              |
| SNP2 | Nuclear respiratory factor 1 (NRF1)                 | 0.92      | cggcgCGC <i>A</i> ggctggcc                         | (+)           | g. -63 G > A |
|      | Zinc finger and SCAN domain containing 10 (ZSCAN10) | 0.86      | tggccagcc <i>T</i> GCGcgc                          | (-)           | g. -63 G > A |

WT stands for wild type. SNP loci are underlined in the table; capital letters are the core sequence of the transcription factors, and the value > 80 denotes a sequence combination with the *Cis*-acting elements.
